# Supplementary material for: Tead1 is required for perinatal cardiomyocyte proliferation
Source: PLOS journal article supplement (doi:10.1371/journal.pone.0212017), 2019-02-27
Supplement: S1 (10.1371/journal.pone.0212017.s001) [file journal.pone.0212017.s001]

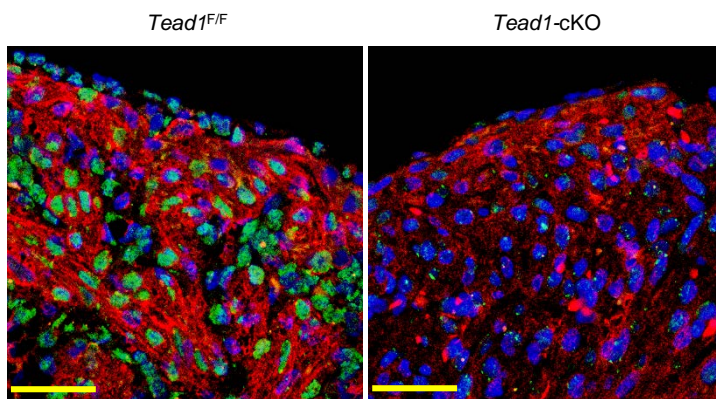

**Figure A. Cardiomyocyte Tead1 knockout validation on heart sections from 1.5-day-old pups.** Representative immunostaining showing Tead1 (green), cardiac Troponin T (red), DAPI (blue). Scale bar, 50  $\mu$ m.

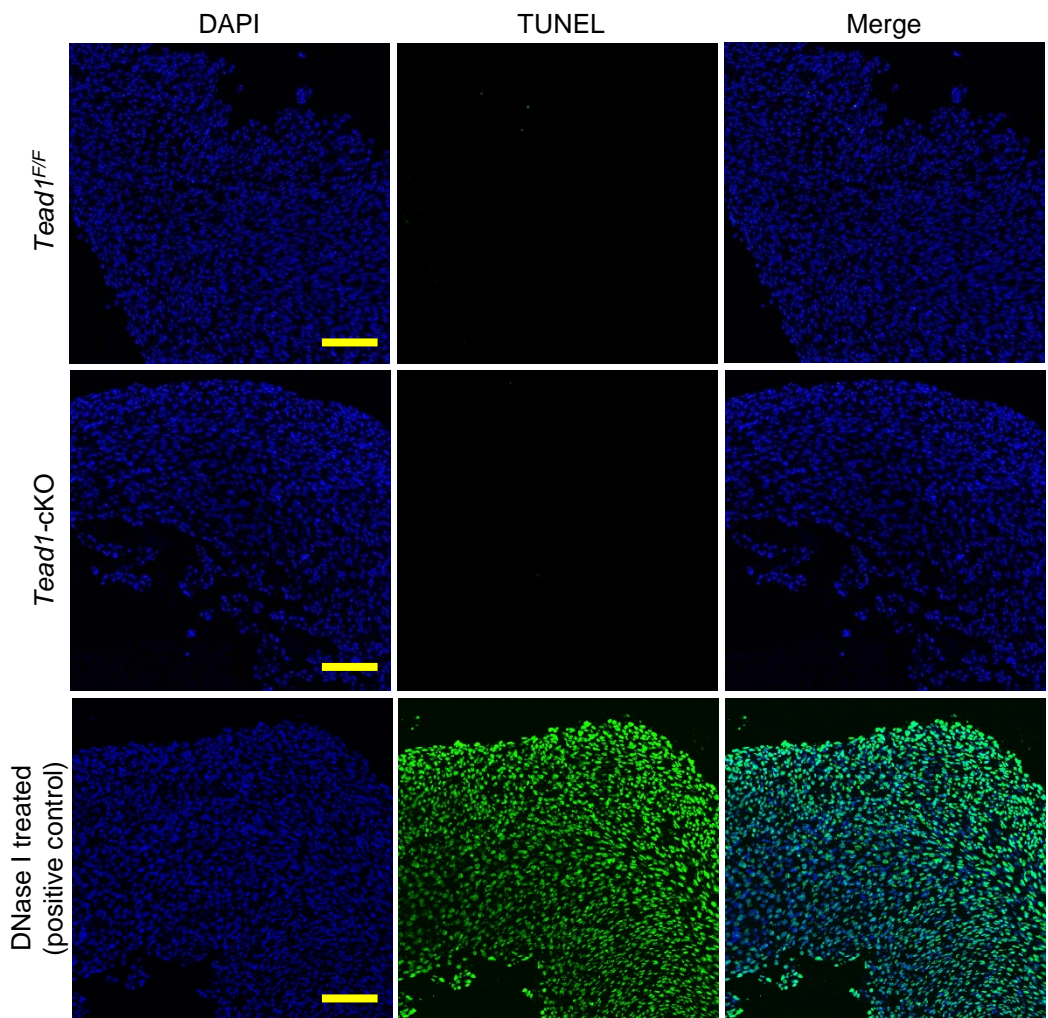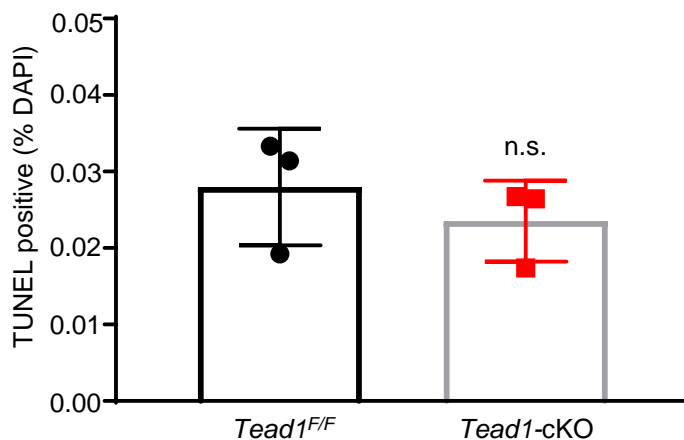

**Figure B. Tead1 ablation did not impact apoptosis.** (A) Representative figures of the TUNEL staining in control and *Tead1-cKO* heart sections. Scale bar, 100  $\mu$ m. (B) Quantitative analysis represents counting from three independent samples per group (approximately  $0.7-1.7 \times 10^5$  cells were counted). Data were analyzed by Mann-Whitney *t*-test.

**A****HL1 cells**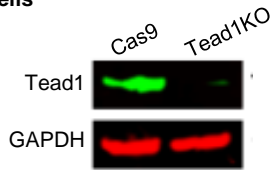**B**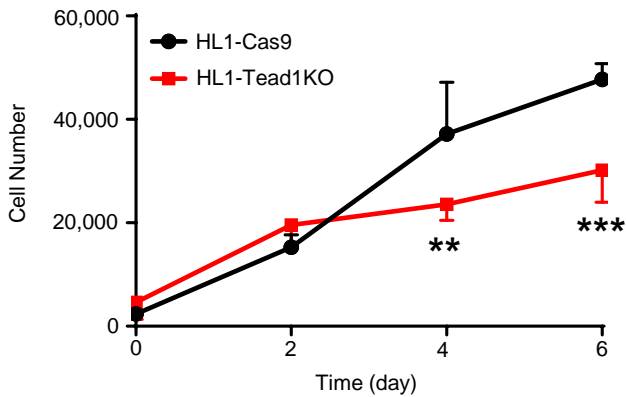

**Figure C. Tead1 regulates cardiomyocyte growth and cell cycle in a cell-autonomous manner.** (i) Western blot validation for Tead1 knockout in stable HL-1 cells. (ii) Cell counts in HL1-Cas9 and HL1-Tead1 knockout (HL1-Tead1KO) cells. Equal number of cells were plated and synchronized by overnight serum starvation, and cell numbers were counted at the indicated time points after reintroduction of complete growth medium (n=4). \*\*  $p < 0.01$ ; \*\*\*  $p < 0.001$ ; data were analyzed by two-way ANOVA followed by Sidak's multiple comparisons test.
